# Supplementary material for: A facile and green strategy for the synthesis of 1-dimensional luminescent ZnO nanorods and their reduction behavior for aromatic nitro-compounds
Source: Royal Society of Chemistry journal article supplement (doi:10.1039/c5ra22908a), 2015-12-11
Supplement: c5ra22908a1.pdf [file c5ra22908a1.pdf]

### Supplementary Information (†)

#### Figures:

1. Figure S1 (a) TEM image of ZnO nanoparticles synthesized in the absence of lauric acid, (b) FTIR spectrum of ZnO nanoparticles formed in the absence of lauric acid.
2. Figure S2 (a) Absorption spectrum of PNP, (b) Absorption spectrum of PNP+ NaBH<sub>4</sub>

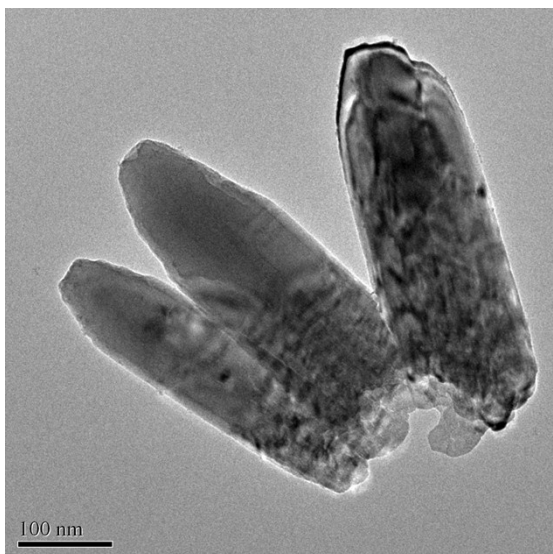

Figure S1 (a) TEM image of ZnO nanoparticles synthesized in the absence of lauric acid having average diameter of 130 nm and length of 415 nm.

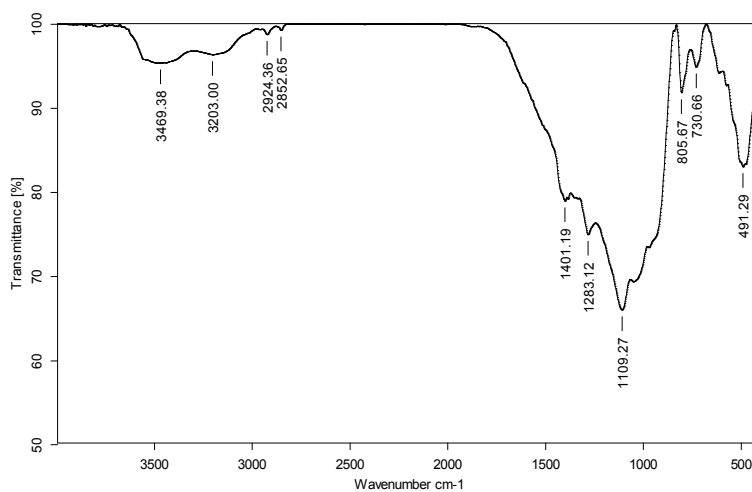

Figure S1(b) FTIR spectrum of ZnO nanoparticles formed in the absence of lauric acid.

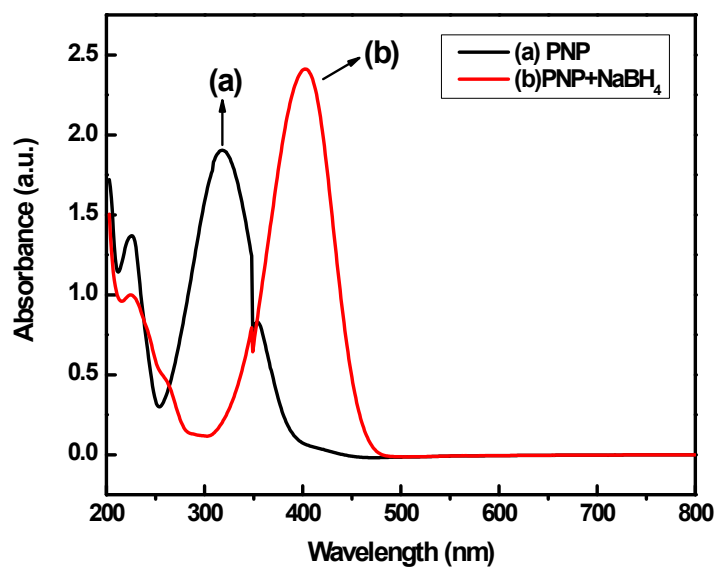

Figure S2 (a) Absorption spectrum of PNP, (b) Absorption spectrum of PNP+ NaBH<sub>4</sub>
